# Supplementary material
Source: PubMed Central journal article supplement (PMC7893548)

## Supplemental Online Content

Tay JK, Cross GB, Toh ST, et al. Design and multicenter clinical validation of a 3-dimensionally printed nasopharyngeal swab for COVID-19 testing. *JAMA Otolaryngol*. Published online February 18, 2021. doi:10.1001/jamaoto.2020.5680

### **eMethods.**

**eFigure 1.** Fluid release and absorption

**eFigure 2.** Categorical results comparing the swabs

**eFigure 3.** Ct values and day of illness

**eFigure 4.** Bland-Altman plots for the comparison of Ct values between paired positive swabs

This supplemental material has been provided by the authors to give readers additional information about their work.

## 1 **eMethods**

### 2 **Swab design**

3 Nasopharyngeal (NP) swabs should capture respiratory epithelial cells and mucus  
4 (cellular-mucus matrix), retain the cellular-mucus matrix while relaying the swab to a  
5 transport container, then release the cellular-mucus matrix into the transport media  
6 from which viral RNA can be detected in order to be effective. Intuitively, the greater  
7 the surface area of the NP swab, the greater the cellular-mucus matrix volume  
8 captured and released, with resultant increased sensitivity of the assay. With that  
9 goal in mind and with awareness of the diameter of the nasal passage through which  
10 the NP swab must journey, a square shaped, helix design with a reservoir concept  
11 was selected. The helix makes 1.5 turns from start to end. This allows for surface  
12 manipulation (sculpting, flexing and weaving) while retaining sufficient structural  
13 integrity for withstanding pushing and turning impact forces. The gaps between the  
14 helix blades and the offset of the blades' inner aspects allow the swab to collect the  
15 cellular-mucus matrix via capillary effect and deposit it into the central reservoir. The  
16 cellular-mucus matrix contained within the reservoir and adherent to the swab tip is  
17 released when the NP swab tip is submerged and agitated in viral transport media.

18

### 19 **3D-printing and sterilization**

20 The 3D printed swabs were designed and developed using Rhino 6 for Windows  
21 (Rhinoceros®, Robert McNeel and Associates, Seattle, WA). After design  
22 development, the CAD files were exported into a STereoLithography (.stl) file and  
23 printed by the Formlabs Form3 printer (Formlabs Inc., Somerville, MA, USA), and  
24 fabricated in Surgical Guide Resin (Formlabs Inc., Somerville, MA, USA) which is  
25 non-cytotoxic, non-sensitizing, non-irritating, and complies with international

26 standards (ISO 109933-1:2018 Biological evaluation of medical devices). The 3D  
27 printed swabs were then steam sterilized according to recommendations from the  
28 United States Centers for Disease Control and Prevention (30 minutes at 121 °C /  
29 250 °F in a gravity displacement autoclave) prior to the testing.

30

### 31 **Tensile, flexural and torsional strength testing**

32 Mechanical testing was performed by an independent testing facility (TÜV SÜD PSB  
33 Singapore). 3D printed swabs samples were tested for tensile and flexural strength  
34 in accordance with international standards (ISO 527-1:2012 Plastics – Determination  
35 of Tensile Properties and ISO 178:2010 Plastics – Determination of Flexural  
36 Properties). For tensile testing, swabs were gripped at 10mm from end of the tip.  
37 Torsional testing was performed by gripping the swab at 12.7mm from both ends and  
38 at a torsional speed of 8 rpm in a clockwise twisting direction. The resulting number  
39 of turns (in degrees) when the specimen breaks was reported.

40

### 41 **Fluid absorption and release**

42 Two types of medium were used for the testing, including the Universal Viral  
43 Transport Medium (Becton, Dickinson and Company, MD, USA #220527) and a  
44 viscous fluid that mimics the human mucus<sup>1</sup> – 25% (w/v) Pluronic F127 aqueous  
45 solution (Sigma Aldrich #P2443), the viscosity of which ranges from 0.6-24 Pa at  
46 20°C from an internal pre-test. Fluid (3ml) was transferred to a 15ml centrifuge tube,  
47 which was then weighted using an analytical balances (Sartorius Entris, Göttingen,  
48 Germany). The swab was immersed in the fluid for 5 – 10 seconds. The tube was  
49 weighted again after removing the swab for the calculation of the absorbed liquid,

50 which is the difference between the weight of the tube before swab immersion and  
51 after removing the immersed swab.

52

53 Two release methods were performed after fluid absorption, including vortex  
54 approach and roll plate approach. The vortex approach is a commonly used  
55 procedure to mix an experimental sample and diluent.<sup>2</sup> An empty 15ml centrifuge  
56 tube was weighted; after the immersed swab was placed into the tube, it was  
57 vortexed on a lab vortex mixer (Vortex Genie 2, model #G-560, Scientific Industries,  
58 USA) for 5 sec. The swab was then removed and the tube was weighted again; the  
59 difference of the tube weights represents the release liquid. The roll plate approach  
60 provides a semi moisture environment that is frequently used in laboratory and  
61 clinical testing for swabs.<sup>3</sup> A swab was weighted before the absorption. After the  
62 absorption procedure, the swab was transferred and rolled with exerting downward  
63 pressure on a 1.5% agar plate (Sigma Aldrich #05040); the swab tip was rolled back  
64 and forth across the agar surface. Then, the swab was weighted again. The  
65 difference of the weight of the swab before and after the roll plate procedure was  
66 used as the release weight of liquid. The volumes of the absorption and release were  
67 calculated using the weights and the density of the two liquids, which were 0.00103  
68 g/μl (universal viral transport media) and 0.00102 g/μl (viscous fluid) from an internal  
69 pre-test. The experiment was repeated three times for each composition of the swab  
70 types, liquids, and release methods.

71

## 72 **Murine coronavirus testing**

73 MHV (strain A59) concentrations of  $10^6$  and  $10^4$  plaque-forming units (PFU) were  
74 each freshly prepared in a microfuge tube containing 1 ml of Dulbecco's modified

75 Eagle's medium (DMEM). Into each spiked sample was dipped each swab, with  
76 swirling and twisting of the swab head for 10 sec, before transferring the infected  
77 swab to a fresh tube containing 1 ml DMEM. From the latter, 140 µl was obtained for  
78 viral RNA extraction using the QIAamp Viral RNA Mini kit (Qiagen, Germany). Each  
79 viral RNA sample (300 ng) was reverse-transcribed to cDNA in a volume of 12.5 µl  
80 comprising M-MLV reverse transcriptase (Promega, USA), and MHV-specific primers  
81 MHV-NF (5'- ACGCTTACATTATCWACTTC-3') and MHV-NR (5'-  
82 GATCTAAATTAGAATTGGTC-3'). Each cDNA sample (1 µl) was subjected to real-  
83 time PCR using FastStart Essential DNA Green Master reaction mix (Roche,  
84 Singapore) together with MHV-NF and MHV-NR primers targeting a 256-bp fragment  
85 of the MHV N gene. Negative controls without cDNA template were also included.  
86 Thermal cycling was conducted using the LightCycler 96 Real-Time PCR System  
87 (Roche, Singapore), with the following parameters: pre-incubation at 95°C for 5 min,  
88 followed by 55 cycles each at 95°C for 10 sec, 40°C for 5 sec, and 72°C for 8 sec.  
89 The relative efficiency of the test swabs was compared based on the determined  
90 threshold cycle (Ct) values.

91

92 References:

93

94 1. Lai SK, Wang YY, Wirtz D, Hanes J. Micro- and macrorheology of mucus. *Adv Drug*  
95 *Deliv Rev.* 2009;61(2):86-100.

96

97 2. Warnke P, Warning L, Podbielski A. Some are more equal--a comparative study on  
98 swab uptake and release of bacterial suspensions. *PLoS One.* 2014;9(7):e102215.

99

100 3. Osterblad M, Jarvinen H, Lonqvist K, et al. Evaluation of a new cellulose sponge-  
101 tipped swab for microbiological sampling: a laboratory and clinical investigation. *J*  
102 *Clin Microbiol.* 2003;41(5):1894-1900.

| Sample_ID_masked | Group   | Reference swab | Odd_or_Even | Day_of_illness | ORF1a_Reference_sw |
|------------------|---------|----------------|-------------|----------------|--------------------|
| C1               | control | FLOQSwab       | 1           |                | Neg                |
| C2               | control | FLOQSwab       | 2           |                | Neg                |
| C3               | control | FLOQSwab       | 1           |                | Neg                |
| C4               | control | FLOQSwab       | 2           |                | Neg                |
| C5               | control | FLOQSwab       | 1           |                | Neg                |
| C6               | control | FLOQSwab       | 2           |                | Neg                |
| C7               | control | FLOQSwab       | 1           |                | Neg                |
| C8               | control | FLOQSwab       | 2           |                | Neg                |
| C9               | control | FLOQSwab       | 1           |                | Neg                |
| C10              | control | FLOQSwab       | 2           |                | Neg                |
| P1               | case    | FLOQSwab       | 2           | 12             | 31.6               |
| P2               | case    | FLOQSwab       | 2           | 5              | 27.22              |
| P3               | case    | FLOQSwab       | 1           | 3              | 25.07              |
| P4               | case    | FLOQSwab       | 2           | 6              | 30.78              |
| P5               | case    | FLOQSwab       | 2           | 2              | 29.9               |
| P6               | case    | FLOQSwab       | 2           | 11             | Neg                |
| P7               | case    | FLOQSwab       | 1           | 10             | 27.66              |
| P8               | case    | FLOQSwab       | 2           | 7              | Neg                |
| P9               | case    | FLOQSwab       | 1           | 6              | Neg                |
| P10              | case    | FLOQSwab       | 1           | 14             | Neg                |
| P11              | case    | FLOQSwab       | 1           | 13             | 31.82              |
| P12              | case    | FLOQSwab       | 2           | 8              | Neg                |
| P13              | case    | FLOQSwab       | 2           | 13             | 30.29              |
| P14              | case    | FLOQSwab       | 2           | 9              | 26.1               |
| P15              | case    | FLOQSwab       | 1           | 13             | Neg                |
| P16              | case    | FLOQSwab       | 2           | 2              | 20.92              |
| P17              | case    | FLOQSwab       | 1           | 3              | 21.84              |
| P18              | case    | FLOQSwab       | 1           | 8              | 32.21              |
| P19              | case    | FLOQSwab       | 1           | 8              | Neg                |
| P20              | case    | FLOQSwab       | 2           | 6              | 31.78              |
| P21              | case    | FLOQSwab       | 1           | 7              | 25.15              |
| P22              | case    | FLOQSwab       | 1           | 14             | 28.97              |
| P23              | case    | FLOQSwab       | 1           | 4              | 31.87              |
| P24              | case    | FLOQSwab       | 2           | 12             | 32.55              |
| P25              | case    | FLOQSwab       | 1           | 11             | 25.84              |
| P26              | case    | FLOQSwab       | 2           | 11             | Neg                |
| P27              | case    | FLOQSwab       | 2           | 9              | 17.39              |
| P28              | case    | FLOQSwab       | 1           | 8              | 29.6               |
| P29              | case    | FLOQSwab       | 1           | 4              | 19.14              |
| P30              | case    | FLOQSwab       | 1           | 4              | 26.86              |
| P31              | case    | FLOQSwab       | 1           | 8              | Neg                |
| P32              | case    | FLOQSwab       | 1           | 8              | Neg                |
| P33              | case    | FLOQSwab       | 2           | 9              | 32.98              |
| P34              | case    | FLOQSwab       | 2           | 10             | 33.06              |
| P35              | case    | FLOQSwab       | 1           | 14             | 33.76              |
| P36              | case    | FLOQSwab       | 1           | 10             | 29.77              |

|     |      |          |   |        |       |
|-----|------|----------|---|--------|-------|
| P37 | case | FLOQSwab | 2 | 7 Neg  |       |
| P38 | case | FLOQSwab | 2 | 9      | 29.64 |
| P39 | case | FLOQSwab | 2 | 8      | 32.49 |
| P40 | case | FLOQSwab | 2 | 8      | 19.54 |
| T1  | case | Dacron   | 2 | 8 Neg  |       |
| T2  | case | Dacron   | 2 | 2      | 31.98 |
| T3  | case | Dacron   | 1 | 11     | 31.45 |
| T4  | case | Dacron   | 1 | 11     | 33.46 |
| T5  | case | Dacron   | 2 | 4 Neg  |       |
| T6  | case | Dacron   | 1 | 4      | 23.48 |
| T7  | case | Dacron   | 2 | 5      | 22.65 |
| T8  | case | Dacron   | 2 | 3      | 18.91 |
| T9  | case | Dacron   | 1 | 5      | 29.92 |
| T10 | case | Dacron   | 2 | 6      | 28.08 |
| T11 | case | Dacron   | 2 | 8      | 34.22 |
| T12 | case | Dacron   | 1 | 6      | 22.04 |
| T13 | case | Dacron   | 1 | 5      | 25    |
| T14 | case | Dacron   | 2 | 7      | 28.19 |
| T15 | case | Dacron   | 1 | 3 Neg  |       |
| T16 | case | Dacron   | 2 | 5      | 30.93 |
| T17 | case | Dacron   | 1 | 5 Neg  |       |
| T18 | case | Dacron   | 2 | 7      | 27.44 |
| T19 | case | Dacron   | 2 | 3 Neg  |       |
| T20 | case | Dacron   | 2 | 3 Neg  |       |
| T21 | case | Dacron   | 1 | 14 Neg |       |
| T22 | case | Dacron   | 1 | 2      | 24.5  |
| T23 | case | Dacron   | 1 | 8 Neg  |       |
| T24 | case | Dacron   | 2 | 7      | 19.19 |
| T25 | case | Dacron   | 1 | 13     | 32.49 |
| T26 | case | Dacron   | 1 | 5      | 24.35 |
| T27 | case | Dacron   | 1 | 5 Neg  |       |
| T28 | case | Dacron   | 1 | 4      | 31.82 |
| T29 | case | Dacron   | 2 | 13     | 32.81 |
| T30 | case | Dacron   | 2 | 6      | 19.99 |
| T31 | case | Dacron   | 1 | 9      | 30.9  |
| T32 | case | Dacron   | 2 | 5      | 25.6  |
| T33 | case | Dacron   | 1 | 11     | 31.06 |
| T34 | case | Dacron   | 2 | 2      | 17.78 |
| T35 | case | Dacron   | 2 | 1      | 24.73 |
| T36 | case | Dacron   | 2 | 7      | 19.88 |
| T37 | case | Dacron   | 2 | 6      | 32.86 |
| T38 | case | Dacron   | 1 | 4      | 21.2  |
| T39 | case | Dacron   | 1 | 12 Neg |       |

ORF1a\_Python\_swab Egene\_Reference\_swab Egene\_Python\_swab

|     |       |       |       |
|-----|-------|-------|-------|
| Neg | Neg   | Neg   |       |
|     | 31.65 | 33.36 | 33.9  |
|     | 26.55 | 27.44 | 26.77 |
|     | 26.74 | 24.87 | 26.87 |
|     | 32.16 | 33.34 | 34.33 |
|     | 28.92 | 30.89 | 29.06 |
| Neg | Neg   | Neg   |       |
|     | 32.54 | 27.55 | 33.07 |
| Neg | Neg   | Neg   |       |
| Neg | Neg   | Neg   |       |
| Neg | Neg   | Neg   |       |
| Neg |       | 34.07 | 35.88 |
| Neg | Neg   | Neg   |       |
|     | 31.51 | 32.73 | 33.99 |
|     | 28.62 | 26.56 | 29.16 |
| Neg | Neg   | Neg   |       |
|     | 22.38 | 20.68 | 22.28 |
|     | 23.08 | 22.1  | 23.37 |
|     | 32.1  | 25.64 | 24.98 |
| Neg |       | 37.76 | Neg   |
|     | 31.8  | 33.82 | 34.14 |
|     | 24.68 | 25.32 | 24.79 |
|     | 33.38 | 30.67 | 34.98 |
|     | 31.68 | 33.28 | 32.72 |
| Neg |       | 34.93 | 35.98 |
|     | 29.65 | 25.91 | 30.2  |
| Neg |       | 38.12 | Neg   |
|     | 19.35 | 17.05 | 19.19 |
|     | 31.89 | 30.43 | 33.11 |
|     | 21.32 | 19.1  | 21.29 |
|     | 30.34 | 26.97 | 31.5  |
| Neg | Neg   | Neg   |       |
| Neg |       | 37.48 | Neg   |
| Neg |       | 35.6  | 38.08 |
|     | 31.56 | 34.49 | 32.44 |
| Neg |       | 35.86 | 37.02 |
|     | 30.73 | 30.6  | 31.03 |



|     |           |           |       |
|-----|-----------|-----------|-------|
| Neg | Neg       | Neg       |       |
|     | 29.11     | 30.19     | 29.92 |
|     | 32        | 33.9      | 33.19 |
|     | 24.16     | 19.14     | 23.85 |
| Neg | Neg       |           | 36.86 |
|     | 34.25     | 32.26     | 34.87 |
|     | 33.4 Neg  |           | 36.63 |
|     | 35.91 Neg | Neg       |       |
| Neg | Neg       | Neg       |       |
|     | 23.8      | 23.36     | 23.72 |
|     | 23.08     | 23.68     | 24.14 |
|     | 19.12     | 20.92     | 21    |
|     | 31        | 30.73     | 32.38 |
|     | 28.67     | 30.62     | 31.36 |
|     | 36.57 Neg |           | 37.08 |
|     | 22.4      | 23.24     | 23.43 |
|     | 25.05     | 29.06     | 29.62 |
|     | 28.91     | 30.08     | 31.03 |
| Neg | Neg       | Neg       |       |
|     | 32.9      | 29.33     | 29.93 |
| Neg | Neg       | Neg       |       |
|     | 28.21     | 24.19     | 24.85 |
| Neg | Neg       |           | 36.64 |
| Neg |           | 32.51     | 33.89 |
| Neg | Neg       | Neg       |       |
|     | 25.04     | 28.05     | 28.55 |
| Neg | Neg       | Neg       |       |
|     | 19.58     | 18.9      | 19.09 |
|     | 35.6      | 31.37     | 33.19 |
|     | 24.94     | 24.9      | 25.61 |
| Neg | Neg       | Neg       |       |
|     | 33.83     | 32.88     | 34.7  |
|     | 34.06     | 34.46     | 35.7  |
|     | 20.53     | 25.99     | 26.54 |
|     | 33.01     | 35.27     | 36.4  |
|     | 26.01     | 23.52     | 24.11 |
|     | 32.86     | 31.46     | 33.96 |
|     | 17.89     | 19.25     | 19.71 |
|     | 25.26     | 24.23     | 24.67 |
|     | 20.52     | 20.89     | 21.52 |
|     | 35.2      | 32.57     | 35.06 |
|     | 21.53     | 21.75     | 22.33 |
|     | 37.58     | 35.19 Neg |       |

**eFigure 1. Fluid release and absorption.** **a-b**, Fluid absorption and release for the FLO-QSwab and 3DP swab for **(a)** universal viral transport media (UVTM) and **(b)** viscous fluid (25% w/v Pluronic F127 aqueous solution), tested using the vortex approach. **c-d**, Fluid absorption and release for the FLOQSwab and 3DP swab for **(c)** UVTM and **(d)** viscous fluid, tested using the roll plate approach.

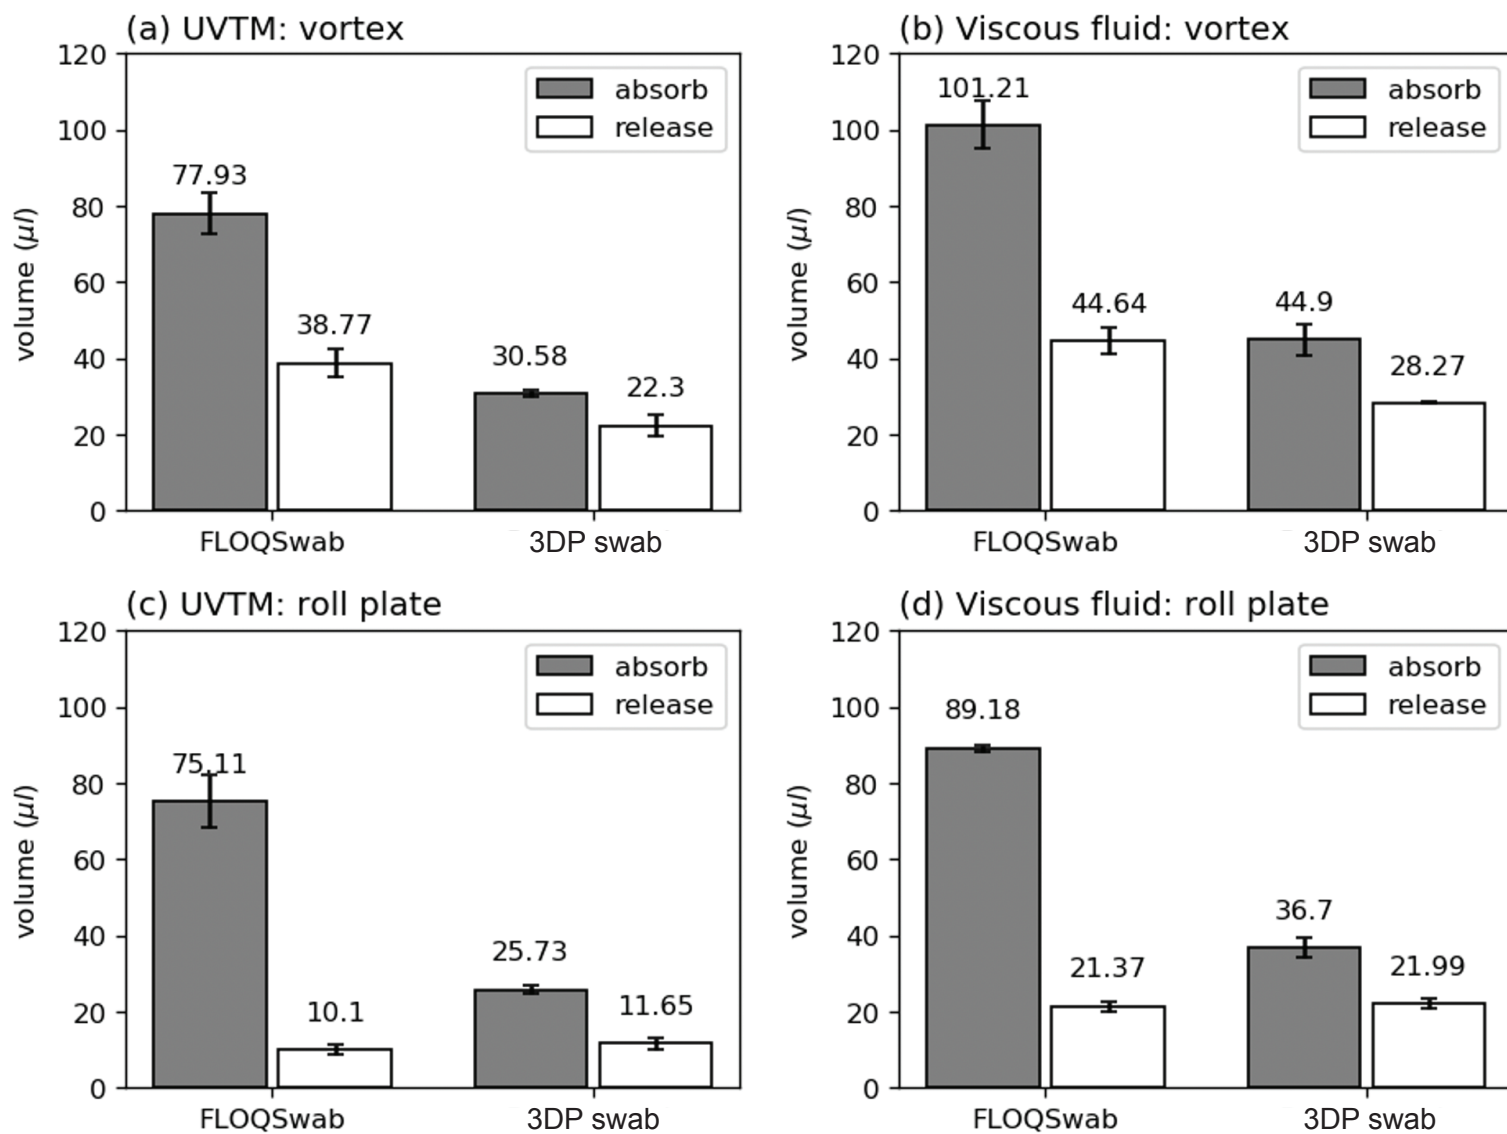

**eFigure 2. a-c,** Categorical results comparing the 3DP swab and FLOQSwab (n = 40) by combined testing for both ORF1ab and E-gene targets, and for each target alone. **d-f,** Categorical results comparing the 3DP swab and Dacron swab, n = 39.

**a**

|          |                  | 3DP swab |          |
|----------|------------------|----------|----------|
|          |                  | Positive | Negative |
| FLOQSwab | Combined testing |          |          |
|          | Positive         | 29       | 3        |
| Negative | 0                | 8        |          |

OA 0.925 (0.796 - 0.984)  
 PPA 0.906 (0.750 - 0.980)  
 NPA 1.00 (0.631 - 1.00)  
 Kappa 0.794

**b**

|          |          | 3DP swab |          |
|----------|----------|----------|----------|
|          |          | Positive | Negative |
| FLOQSwab | ORF1ab   |          |          |
|          | Positive | 25       | 4        |
| Negative | 0        | 11       |          |

OA 0.900 (0.763 - 0.972)  
 PPA 0.862 (0.683 - 0.961)  
 NPA 1.00 (0.715 - 1.00)  
 Kappa 0.774

**c**

|          |          | 3DP swab |          |
|----------|----------|----------|----------|
|          |          | Positive | Negative |
| FLOQSwab | E-gene   |          |          |
|          | Positive | 29       | 3        |
| Negative | 0        | 8        |          |

OA 0.925 (0.796 - 0.984)  
 PPA 0.906 (0.750 - 0.980)  
 NPA 1.00 (0.631 - 1.00)  
 Kappa 0.794

**d**

|             |                  | 3DP swab |          |
|-------------|------------------|----------|----------|
|             |                  | Positive | Negative |
| Dacron swab | Combined testing |          |          |
|             | Positive         | 29       | 1        |
| Negative    | 3                | 6        |          |

OA 0.897 (0.758 - 0.971)  
 PPA 0.967 (0.828 - 0.999)  
 NPA 0.667 (0.299 - 0.925)  
 Kappa 0.689

**e**

|             |          | 3DP swab |          |
|-------------|----------|----------|----------|
|             |          | Positive | Negative |
| Dacron swab | ORF1ab   |          |          |
|             | Positive | 26       | 3        |
| Negative    | 2        | 8        |          |

OA 0.872 (0.726 - 0.957)  
 PPA 0.897 (0.726 - 0.978)  
 NPA 0.800 (0.444 - 0.975)  
 Kappa 0.674

**f**

|             |          | 3DP swab |          |
|-------------|----------|----------|----------|
|             |          | Positive | Negative |
| Dacron swab | E-gene   |          |          |
|             | Positive | 28       | 2        |
| Negative    | 3        | 6        |          |

OA 0.872 (0.726 - 0.957)  
 PPA 0.933 (0.779 - 0.992)  
 NPA 0.667 (0.299 - 0.925)  
 Kappa 0.624

**eFigure 3.**

**a-b,** Ct values and day of illness for the ORF1ab target for the FLOQSwab and the paired 3DP swab. **c-d,** Ct values and day of illness for the E-gene target for the FLOQSwab and the paired 3DP swab. n = 40, red lines represents line of best fit in a linear model.

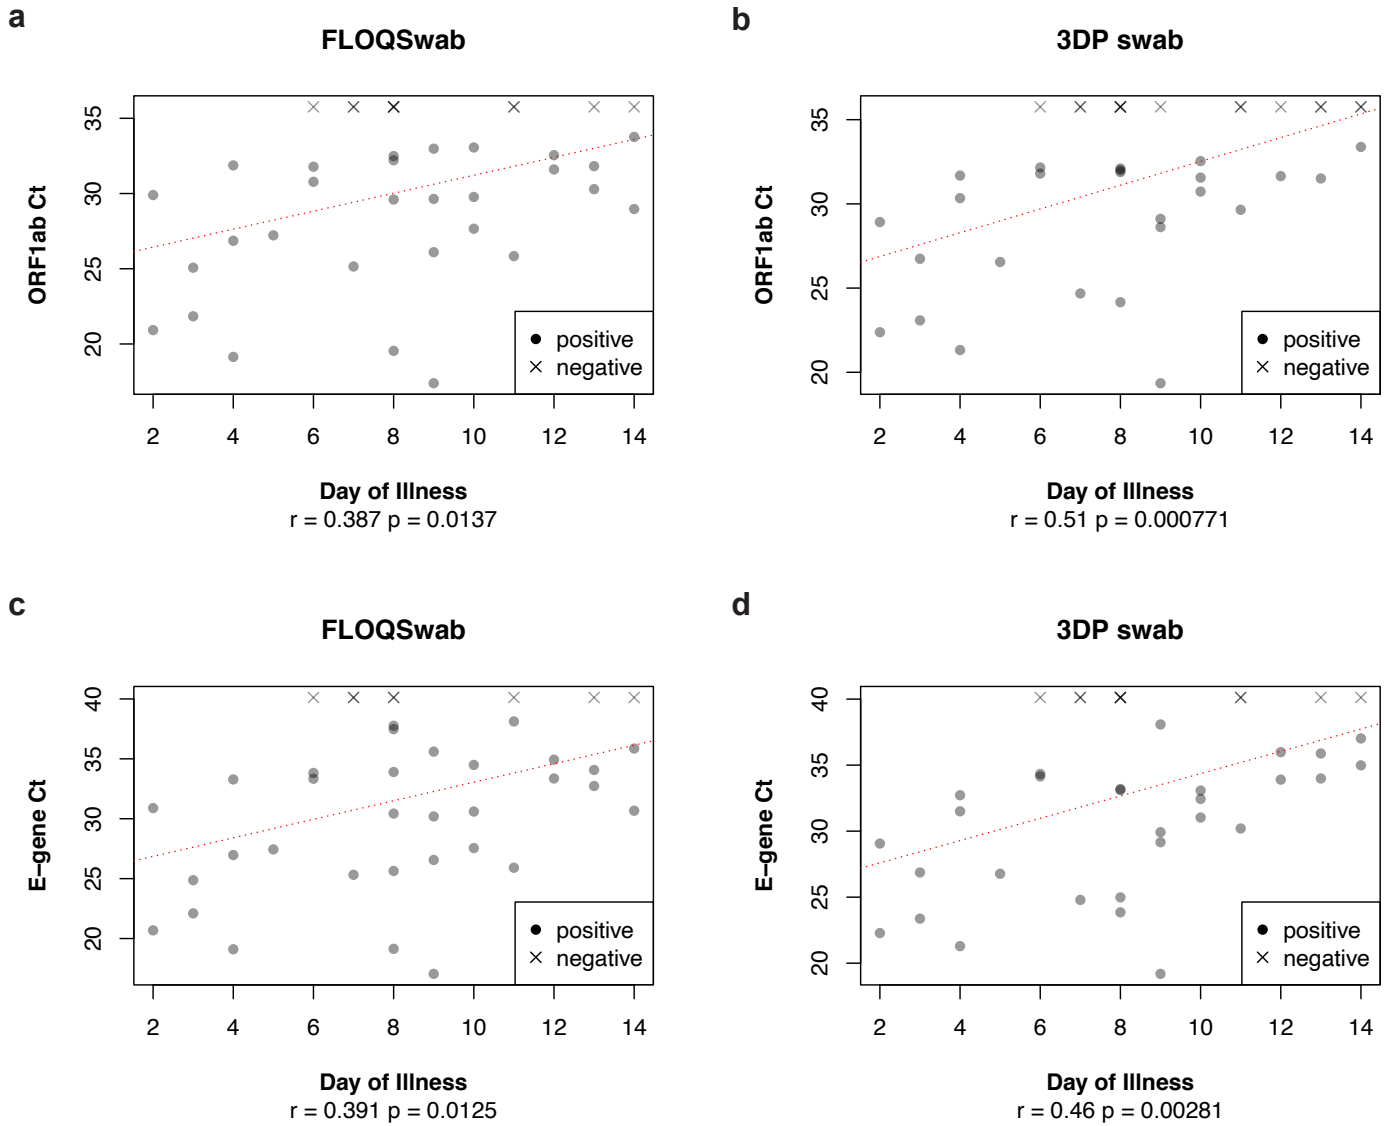

**eFigure 4.** Bland-Altman plots for the comparison of Ct values between paired positive swabs for the ORF1ab and E-gene when comparing the 3DP swab with the FLOQSwab (**a,b**) and the Dacron swab (**c,d**). The horizontal axis shows the mean Ct value for each pair of swabs, while the vertical axis shows the difference in Ct value between the swabs (Ct value for 3DP swab - Ct value for reference swab). The mean difference in Ct value is represented by the blue bar and the shaded area represents the boundaries of the 95% confidence interval.

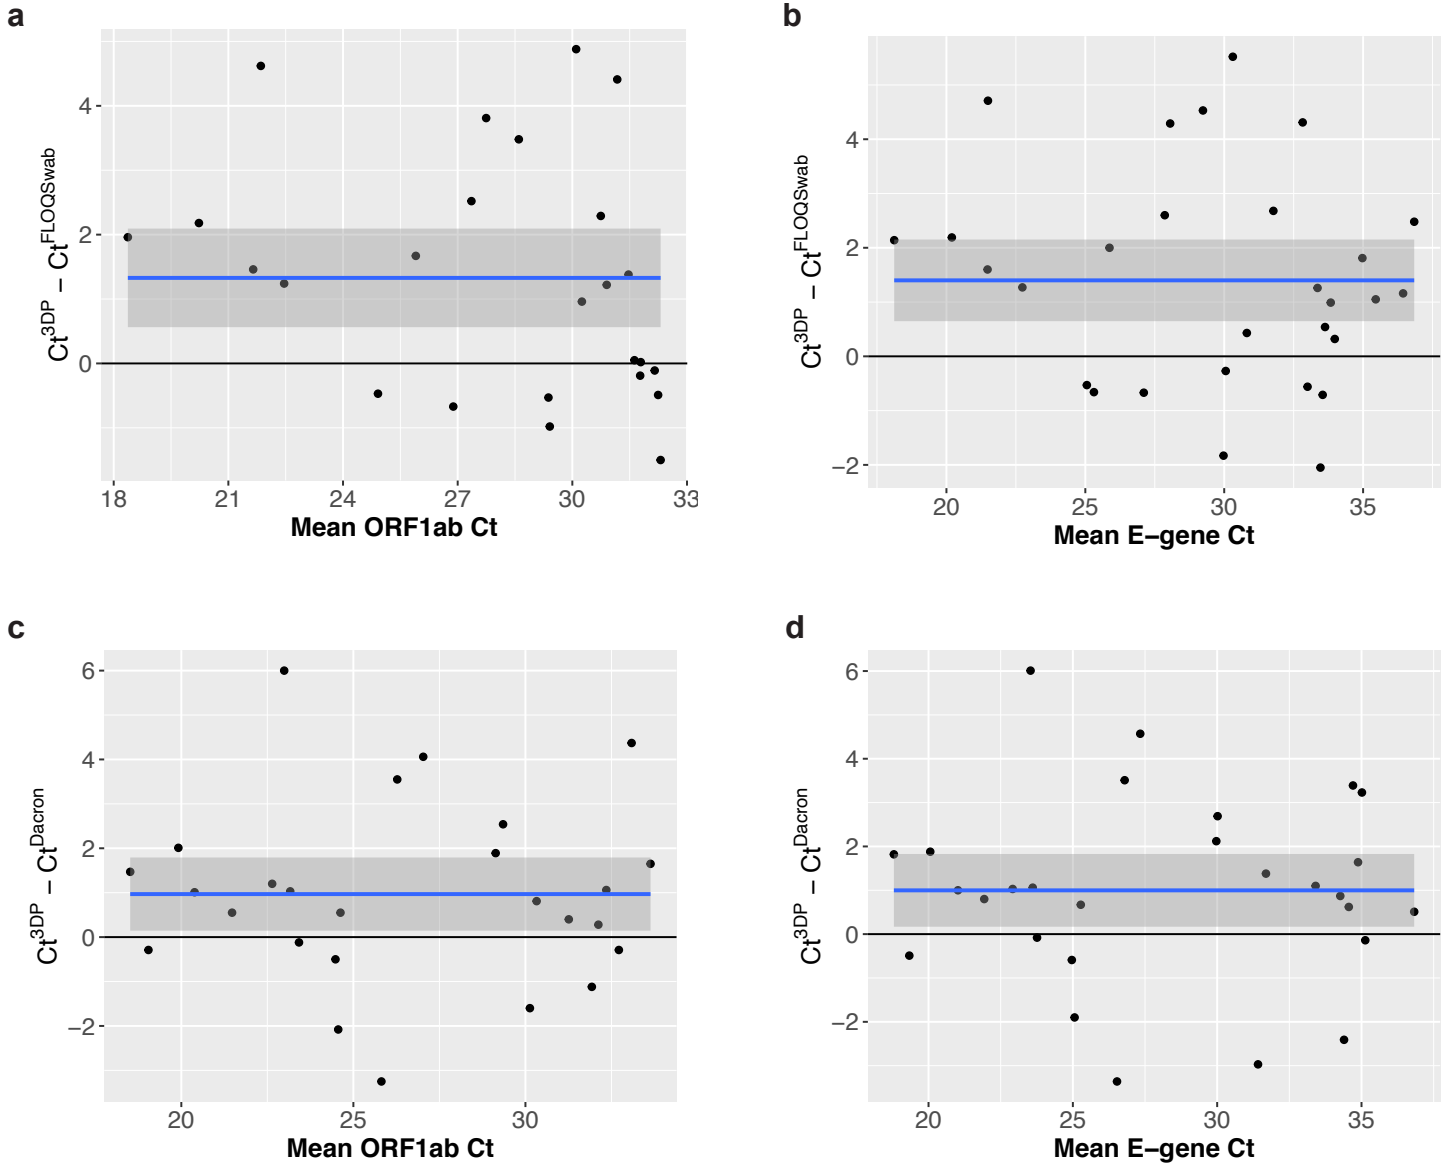

Supplement: jamaotolaryngolheadnecksurg-e205680-s001.pdf [file jamaotolaryngolheadnecksurg-e205680-s001.pdf]
